# Supplementary material
Source: publisher figshare collection journal article supplement (https://gsapubs.figshare.com/ndownloader/files/26885639)
Supplement: Supplementary file 1 [file 26885639]

## Sheet: Sheet1
Table S1. Representative chemical compositions (wt. %) of garnet from the paragneisses
Sample	91-19												91-19					91-41
Domain	rim	rim	rim	rim	core	core	core	core	core	core	core	core	rim	core	core	core	rim	rim	core	core	core	core	core	rim
Spot	252	253	254	256	258	262	266	267	272	274	275	279	7	9	11	10	8	139	140	148	151	161	167	168
SiO2	37.11	38.04	37.92	38.29	37.82	37.8	37.7	37.93	38.09	37.69	37.63	38.01	37.64	37.56	37.94	37.65	37.59	37.1	36.93	37.25	37.38	37.12	37.52	37.06
TiO2	0	0	0.02	0.04	0.04	0.04	0.01	0	0.02	0.01	0.02	0	0.03	0.01	0	0.02	0	0	0	0	0.02	0	0.06	0
Al2O3	20.3	20.31	20.6	20.56	20.36	20.72	20.52	20.54	20.46	20.32	20.43	20.43	20.2	20.55	20.36	20.49	20.3	20.36	20.61	20.27	20.3	20.59	20.44	20.5
Cr2O3	0.05	0.02	0	0	0	0.05	0.01	0.01	0	0	0	0.01	0	0.02	0	0.03	0.01	0	0.03	0	0.02	0	0.02	0.03
FeO	30.13	29.56	29.8	31.34	32.41	33.21	33.51	33.46	32.39	32.97	32.35	32.46	28.37	29.29	29.21	29.42	27.14	29.28	30.11	28.73	28.9	29.13	28.84	28.97
MnO	7.74	7.51	5.53	2.9	1.57	0.93	0.98	1.09	1.39	1.32	1.52	1.9	9.47	7.72	7.85	7.84	10.24	8.73	6.84	8.34	8.87	8.55	7.69	9.18
MgO	2.56	2.65	3.25	3.54	3.8	3.43	3.21	3.1	3.06	3.04	3.12	3.11	2.64	3.03	2.89	2.78	2.56	2.41	3.19	2.74	2.52	2.59	3.15	2.53
CaO	1.56	1.76	2.34	2.9	3.44	3.47	3.71	3.75	3.77	4.01	3.99	3.8	1.57	1.15	1.16	1.22	1.8	1.63	1.32	1.65	1.44	1.68	1.63	1.5
Na2O	0	0.04	0	0	0.15	0	0.02	0.03	0	0.02	0	0	0.02	0.02	0.03	0.02	0.04	0.02	0	0.03	0.08	0.01	0.04	0.02
K2O	0	0	0	0.03	0	0	0	0.01	0	0	0.01	0	0.01	0	0	0.01	0.03	0.01	0.02	0.01	0	0.01	0.01	0
NiO	0	0.02	0	0	0	0.03	0.01	0.03	0	0	0	0	0	0.02	0	0	0.02	0.02	0	0.03	0.02	0	0	0.04
Total	99.45	99.89	99.46	99.59	99.58	99.7	99.68	99.96	99.18	99.37	99.07	99.71	99.93	99.37	99.43	99.47	99.71	99.56	99.05	99.02	99.54	99.66	99.4	99.83
Si	3.02	3.08	3.06	3.07	3.03	3.03	3.03	3.04	3.08	3.04	3.04	3.05	3.05	3.05	3.08	3.06	3.05	3.02	3	3.04	3.04	3.01	3.04	3.01
Ti	0	0	0	0	0	0	0	0	0	0	0	0	0	0	0	0	0	0	0	0	0	0	0	0
Al	1.95	1.94	1.96	1.95	1.92	1.96	1.94	1.94	1.95	1.93	1.95	1.93	1.93	1.96	1.95	1.96	1.94	1.95	1.97	1.95	1.94	1.97	1.95	1.96
Fe3+	0.01	0	0	0	0.04	0	0	0	0	0	0	0	0	0	0	0	0	0.02	0.02	0	0	0.01	0	0.03
Fe2+	2.04	2	2.01	2.1	2.13	2.23	2.25	2.24	2.19	2.22	2.19	2.18	1.92	1.99	1.98	2	1.84	1.97	2.03	1.96	1.96	1.96	1.95	1.94
Mn	0.53	0.51	0.38	0.2	0.11	0.06	0.07	0.07	0.1	0.09	0.1	0.13	0.65	0.53	0.54	0.54	0.7	0.6	0.47	0.58	0.61	0.59	0.53	0.63
Mg	0.31	0.32	0.39	0.42	0.45	0.41	0.38	0.37	0.37	0.37	0.38	0.37	0.32	0.37	0.35	0.34	0.31	0.29	0.39	0.33	0.31	0.31	0.38	0.31
Ca	0.14	0.15	0.2	0.25	0.29	0.3	0.32	0.32	0.33	0.35	0.35	0.33	0.14	0.1	0.1	0.11	0.16	0.14	0.11	0.14	0.13	0.15	0.14	0.13
Na	0	0.01	0	0	0.02	0	0	0.01	0	0	0	0	0	0	0	0	0.01	0	0	0	0.01	0	0.01	0
Prp	0.1	0.11	0.13	0.14	0.15	0.14	0.13	0.12	0.12	0.12	0.12	0.12	0.11	0.12	0.12	0.11	0.1	0.1	0.13	0.11	0.1	0.1	0.13	0.1
Grs	0.05	0.05	0.07	0.08	0.1	0.1	0.11	0.11	0.11	0.11	0.11	0.11	0.04	0.03	0.03	0.04	0.05	0.05	0.04	0.05	0.04	0.05	0.05	0.04
Alm	0.68	0.67	0.67	0.71	0.71	0.74	0.74	0.75	0.73	0.74	0.73	0.72	0.64	0.67	0.67	0.67	0.61	0.66	0.68	0.65	0.65	0.65	0.65	0.64
Spe	0.18	0.17	0.13	0.07	0.04	0.02	0.02	0.02	0.03	0.03	0.03	0.04	0.21	0.18	0.18	0.18	0.23	0.2	0.16	0.19	0.2	0.2	0.18	0.21
